# Supplementary material for: First-principles molecular dynamics simulations of UCln–MgCl2 (n = 3, 4) molten salts
Source: Royal Society of Chemistry journal article supplement (doi:10.1039/d2cp02417a), 2022-01-01

**Online supporting information for:**

**First principles molecular dynamics simulations of  $\text{UCl}_n\text{-MgCl}_2$   
( $n=3, 4$ ) molten salts**

Bo Li,<sup>1</sup> Sheng Dai,<sup>2,3</sup> and De-en Jiang<sup>4,\*</sup>

<sup>1</sup>Department of Chemistry, University of California, Riverside, California 92521, United States

<sup>2</sup>Department of Chemistry, University of Tennessee, Knoxville, Tennessee 37996, United States

<sup>3</sup>Chemical Sciences Division, Oak Ridge National Laboratory, Oak Ridge, Tennessee 37831,  
United States

<sup>4</sup>Department of Chemical and Biomolecular Engineering, Vanderbilt University, Nashville,  
Tennessee 37235, United States

\*Corresponding author: [de-en.jiang@vanderbilt.edu](mailto:de-en.jiang@vanderbilt.edu)

**Initial structures from Packmol and final snapshots from FPMD.  
Color code: U, gray; Mg, brown, Cl, green.**

|                                                               |   |
|---------------------------------------------------------------|---|
| $\text{UCl}_3\text{-MgCl}_2$ , $x(\text{UCl}_3) = 0.1$ .....  | 2 |
| $\text{UCl}_3\text{-MgCl}_2$ , $x(\text{UCl}_3) = 0.2$ .....  | 2 |
| $\text{UCl}_3\text{-MgCl}_2$ , $x(\text{UCl}_3) = 0.3$ .....  | 3 |
| $\text{UCl}_3\text{-MgCl}_2$ , $x(\text{UCl}_3) = 0.4$ .....  | 3 |
| $\text{UCl}_3\text{-MgCl}_2$ , $x(\text{UCl}_3) = 0.5$ .....  | 4 |
| $\text{UCl}_3\text{-MgCl}_2$ , $x(\text{UCl}_3) = 0.75$ ..... | 4 |
| $\text{UCl}_3\text{-MgCl}_2$ , $x(\text{UCl}_3) = 1.0$ .....  | 5 |
| $\text{UCl}_4\text{-MgCl}_2$ , $x(\text{UCl}_4) = 0.1$ .....  | 5 |
| $\text{UCl}_4\text{-MgCl}_2$ , $x(\text{UCl}_4) = 0.2$ .....  | 6 |
| $\text{UCl}_4\text{-MgCl}_2$ , $x(\text{UCl}_4) = 0.3$ .....  | 6 |
| $\text{UCl}_4\text{-MgCl}_2$ , $x(\text{UCl}_4) = 0.4$ .....  | 7 |
| $\text{UCl}_4\text{-MgCl}_2$ , $x(\text{UCl}_4) = 0.5$ .....  | 7 |
| $\text{UCl}_4\text{-MgCl}_2$ , $x(\text{UCl}_4) = 0.75$ ..... | 8 |
| $\text{UCl}_4\text{-MgCl}_2$ , $x(\text{UCl}_4) = 1.0$ .....  | 8 |

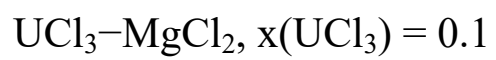

Initial structure

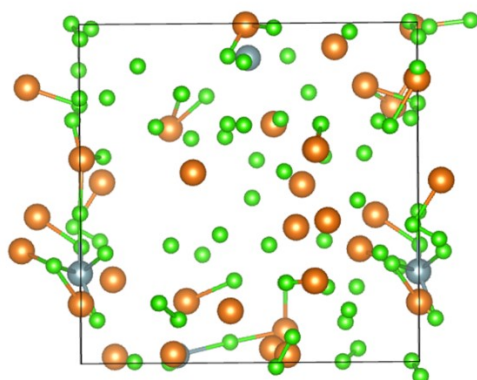

Final snapshot

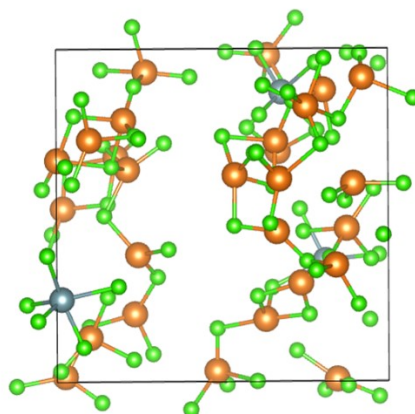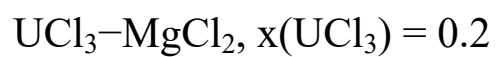

Initial structure

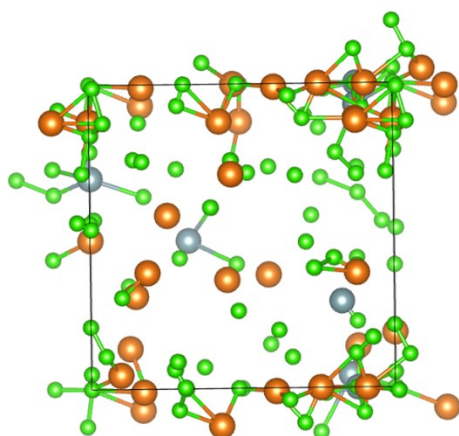

Final snapshot

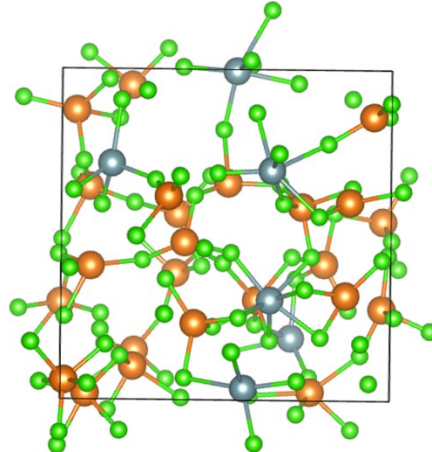

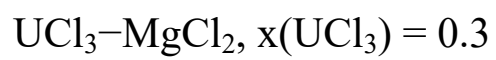

Initial structure

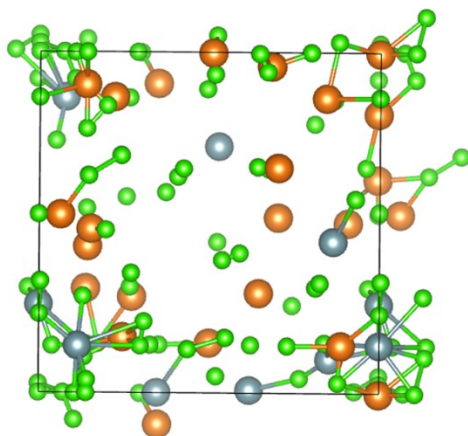

Final snapshot

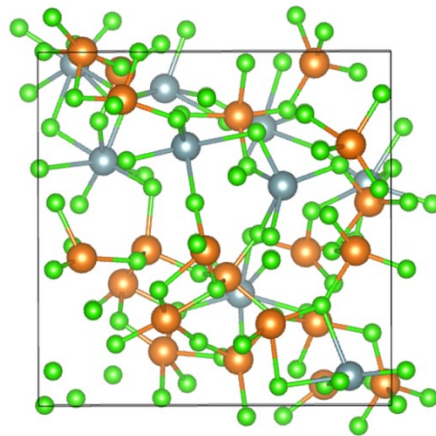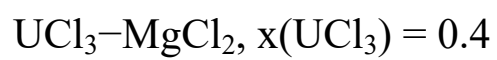

Initial structure

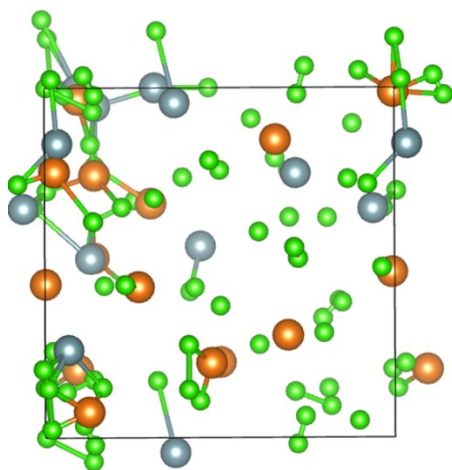

Final snapshot

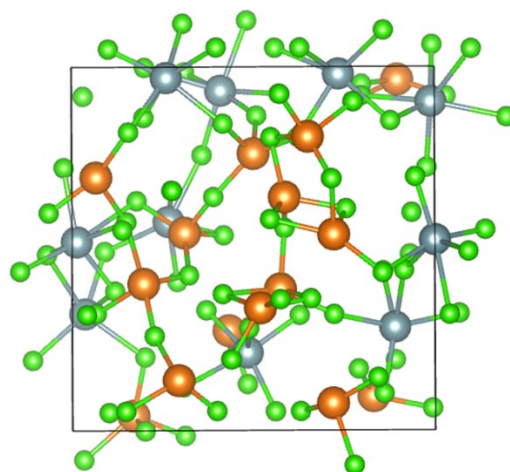

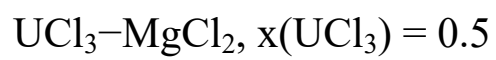

Initial structure

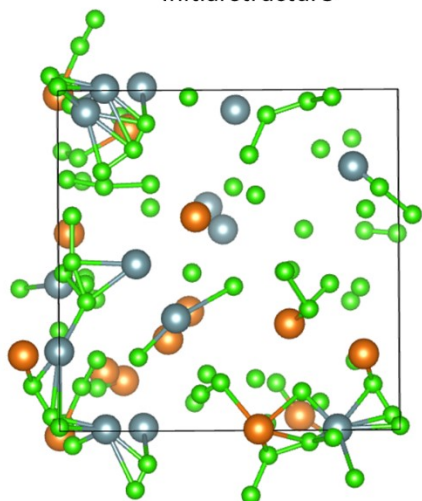

Final snapshot

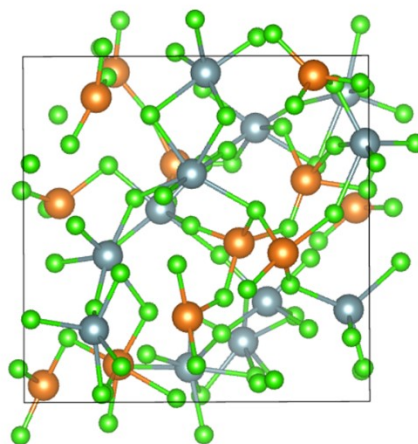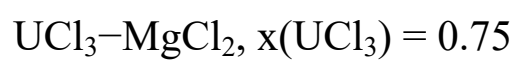

Initial structure

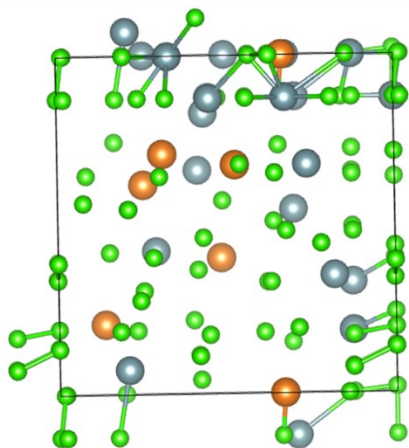

Final snapshot

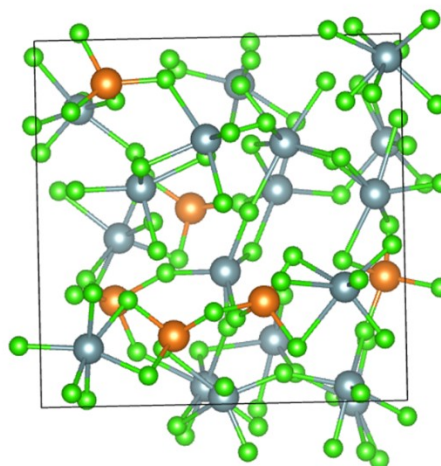

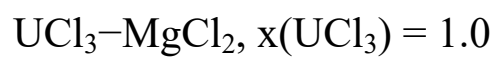

Initial structure

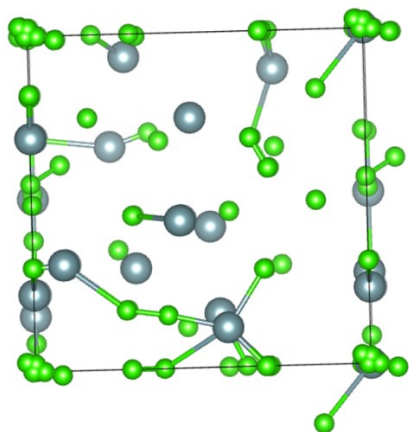

Final snapshot

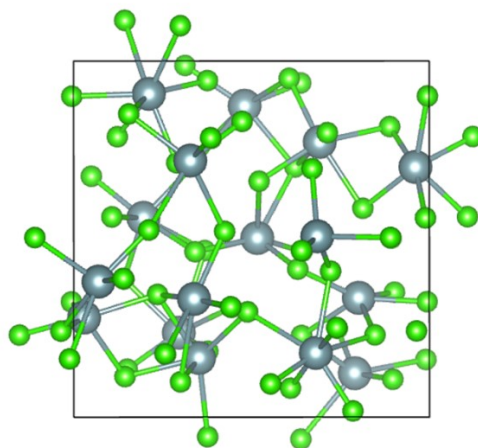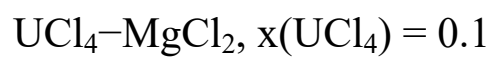

Initial structure

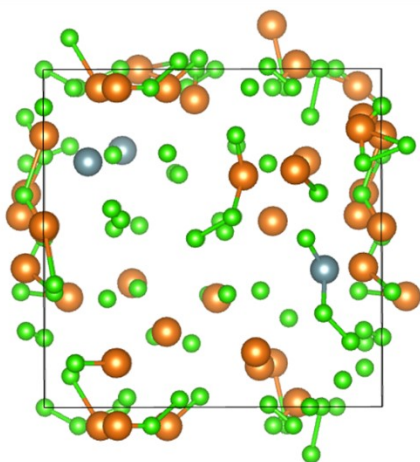

Final snapshot

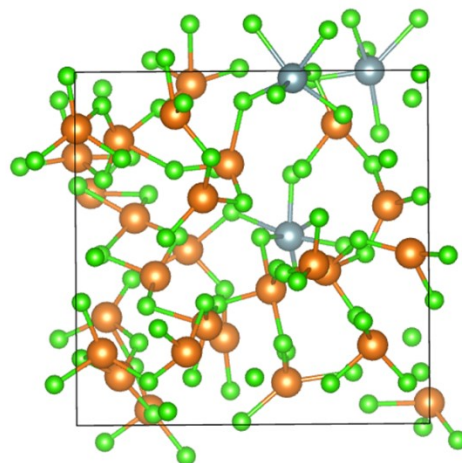



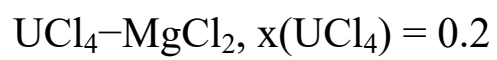

Initial structure

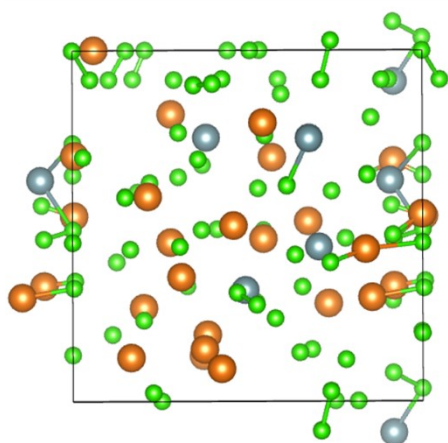

Final snapshot

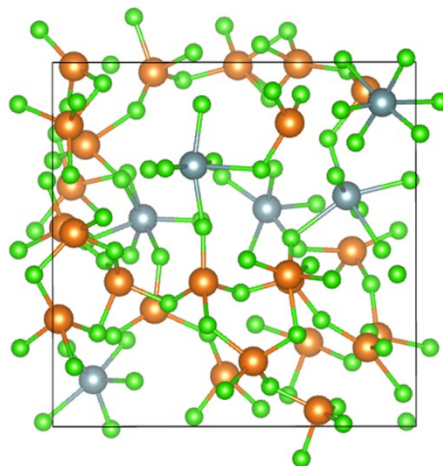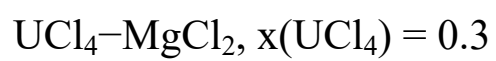

Initial structure

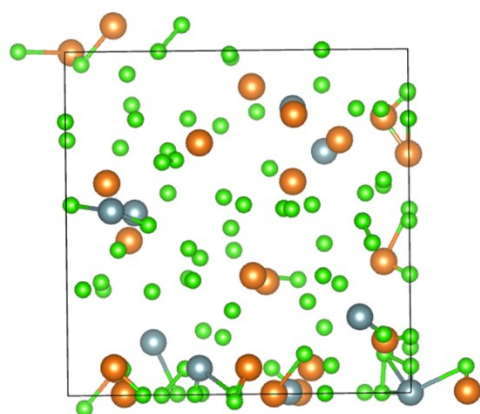

Final snapshot

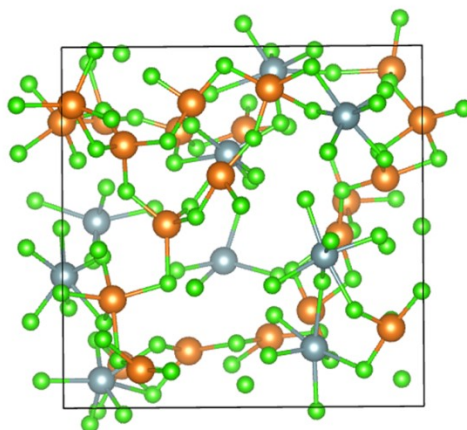

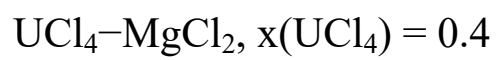

Initial structure

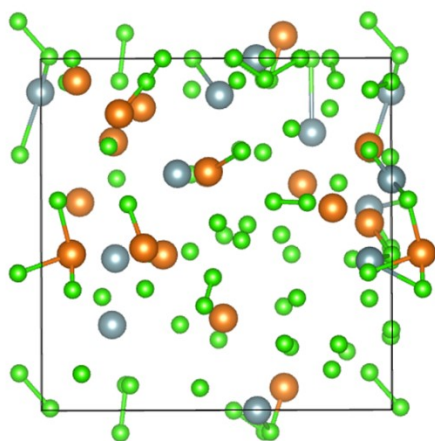

Final snapshot

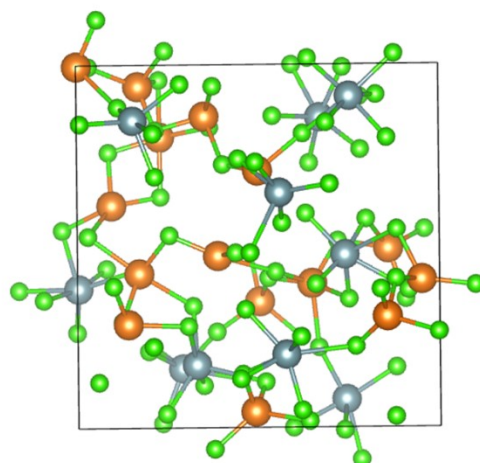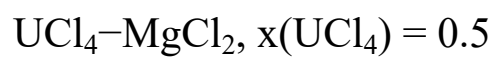

Initial structure

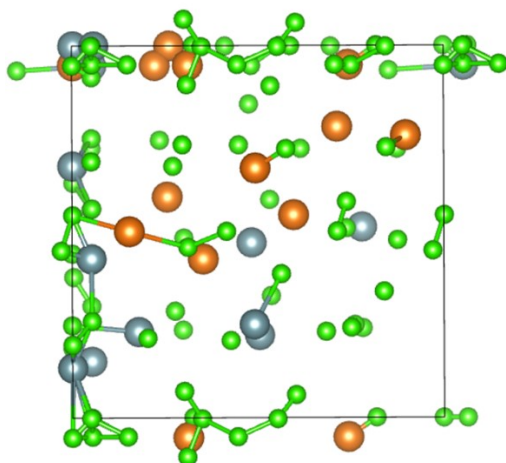

Final snapshot

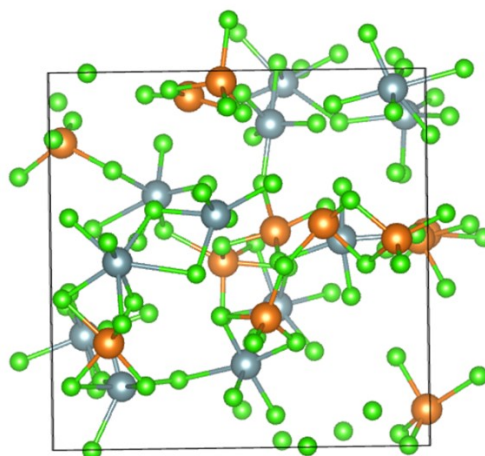

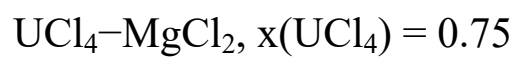

Initial structure

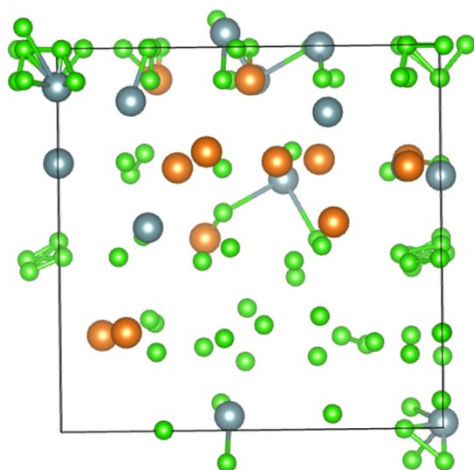

Final snapshot

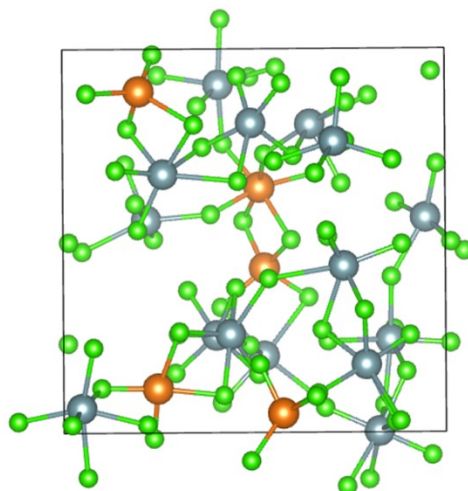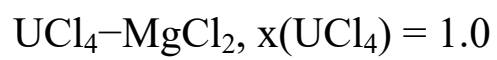

Initial structure

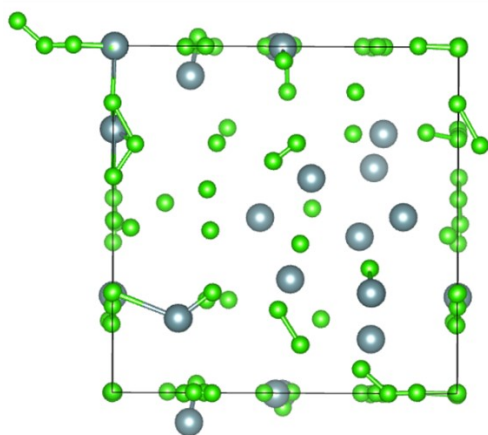

Final snapshot

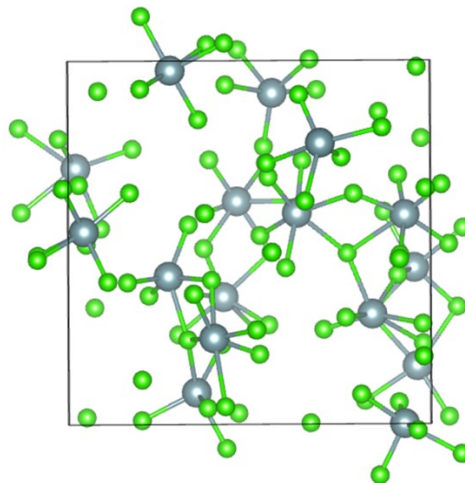

Supplement: d2cp02417a1.pdf [file d2cp02417a1.pdf]
